# Supplementary material for: A High-Resolution Shape Fitting and Simulation Demonstrated Equatorial Cell Surface Softening during Cytokinesis and Its Promotive Role in Cytokinesis
Source: PubMed Central journal article supplement (PMC3281004; doi:10.1371/journal.pone.0031607), 2012-02-16
Supplement: pone.0031607.s004.pdf [file pone.0031607.s004.pdf]

A

Shape

*wild-type* vs *zen-4 ts*

Furrow radius  
= 0.9~0.8

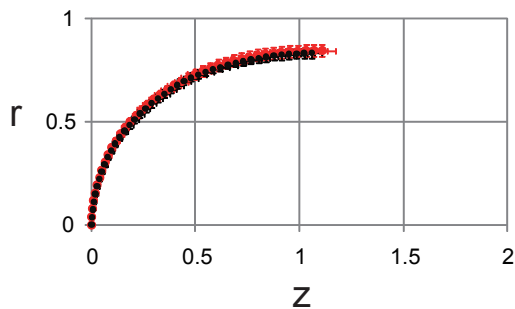

Furrow radius  
= 0.4~0.3

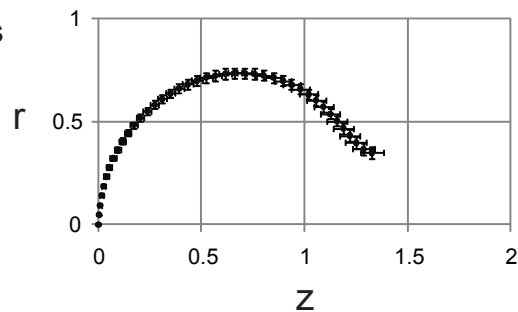

Furrow radius  
= 0.8~0.7

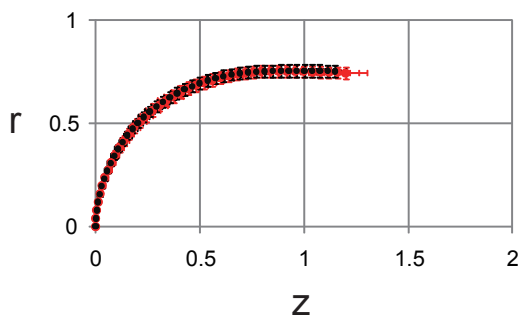

Furrow radius  
= 0.3~0.2

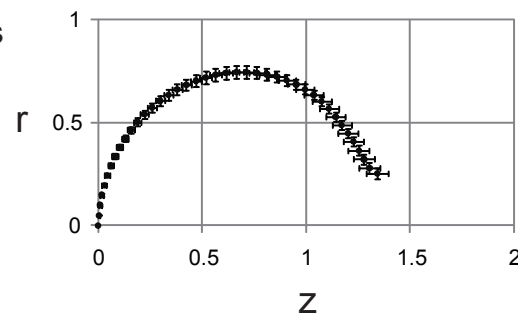

Furrow radius  
= 0.7~0.6

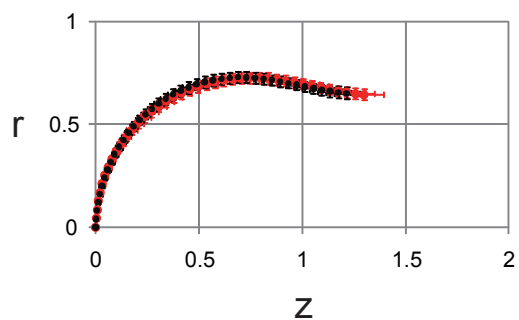

Furrow radius  
= 0.2~0.1

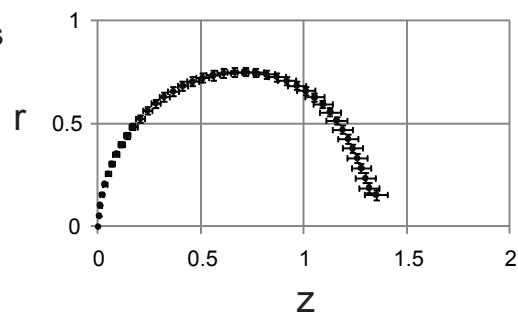

Furrow radius  
= 0.6~0.5

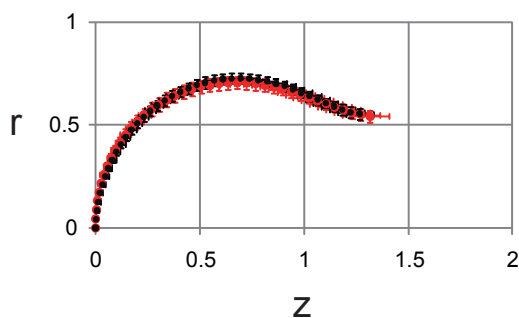

Furrow radius  
= 0.1~0.0

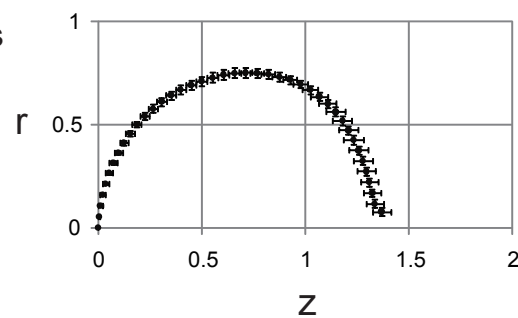

Furrow radius  
= 0.5~0.4

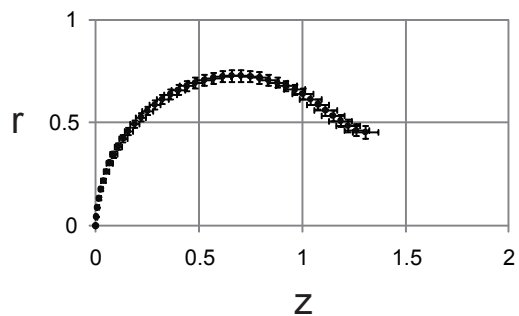

Figure S3

B

*wild-type*Furrow radius  
= 0.9~0.8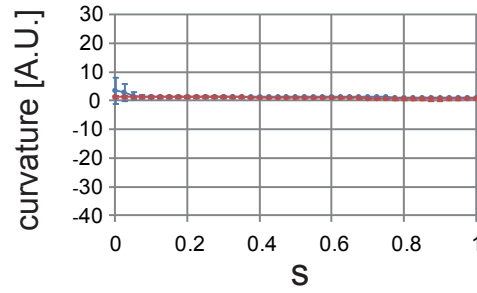Curvature (enlarged)  $C_p$   
 $C_m$ 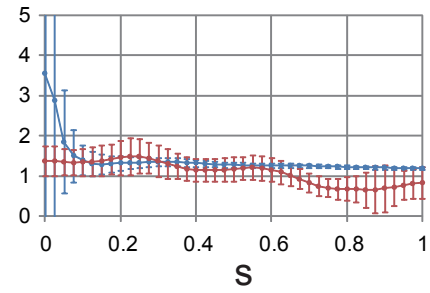Furrow radius  
= 0.8~0.7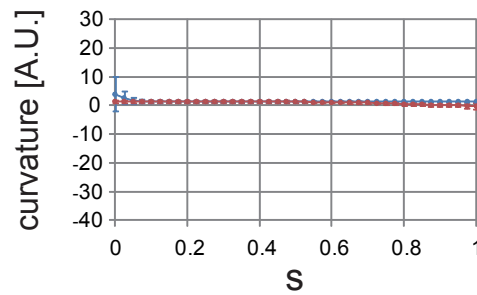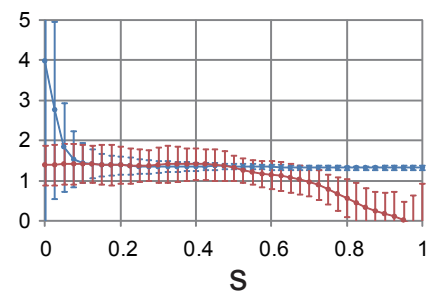Furrow radius  
= 0.7~0.6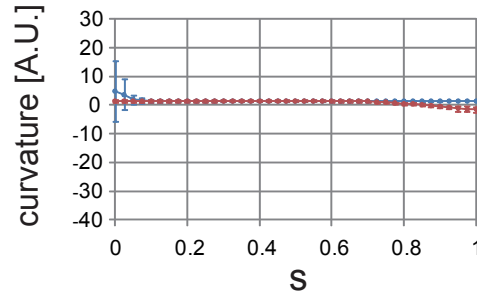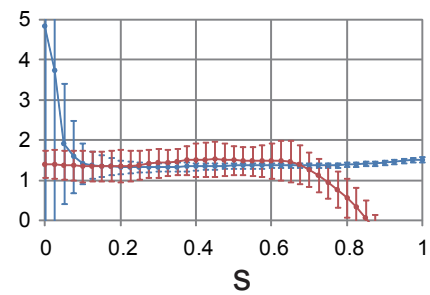Furrow radius  
= 0.6~0.5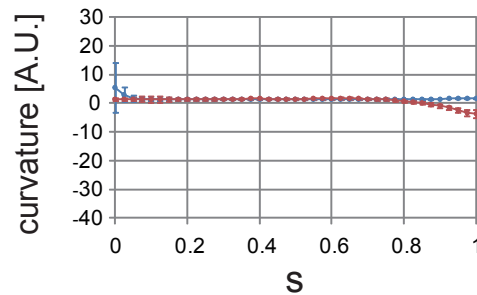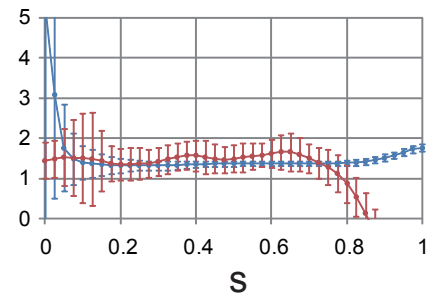Furrow radius  
= 0.5~0.4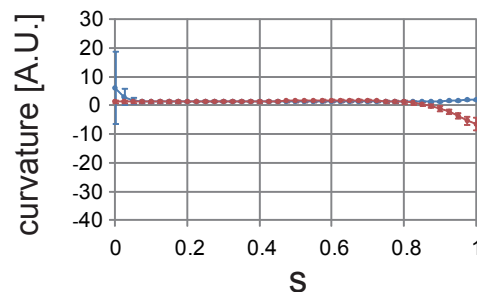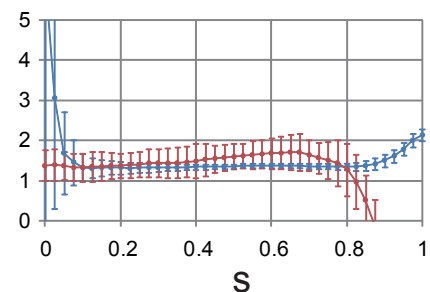

Figure S3 (continued)

B (continued)

*wild-type*

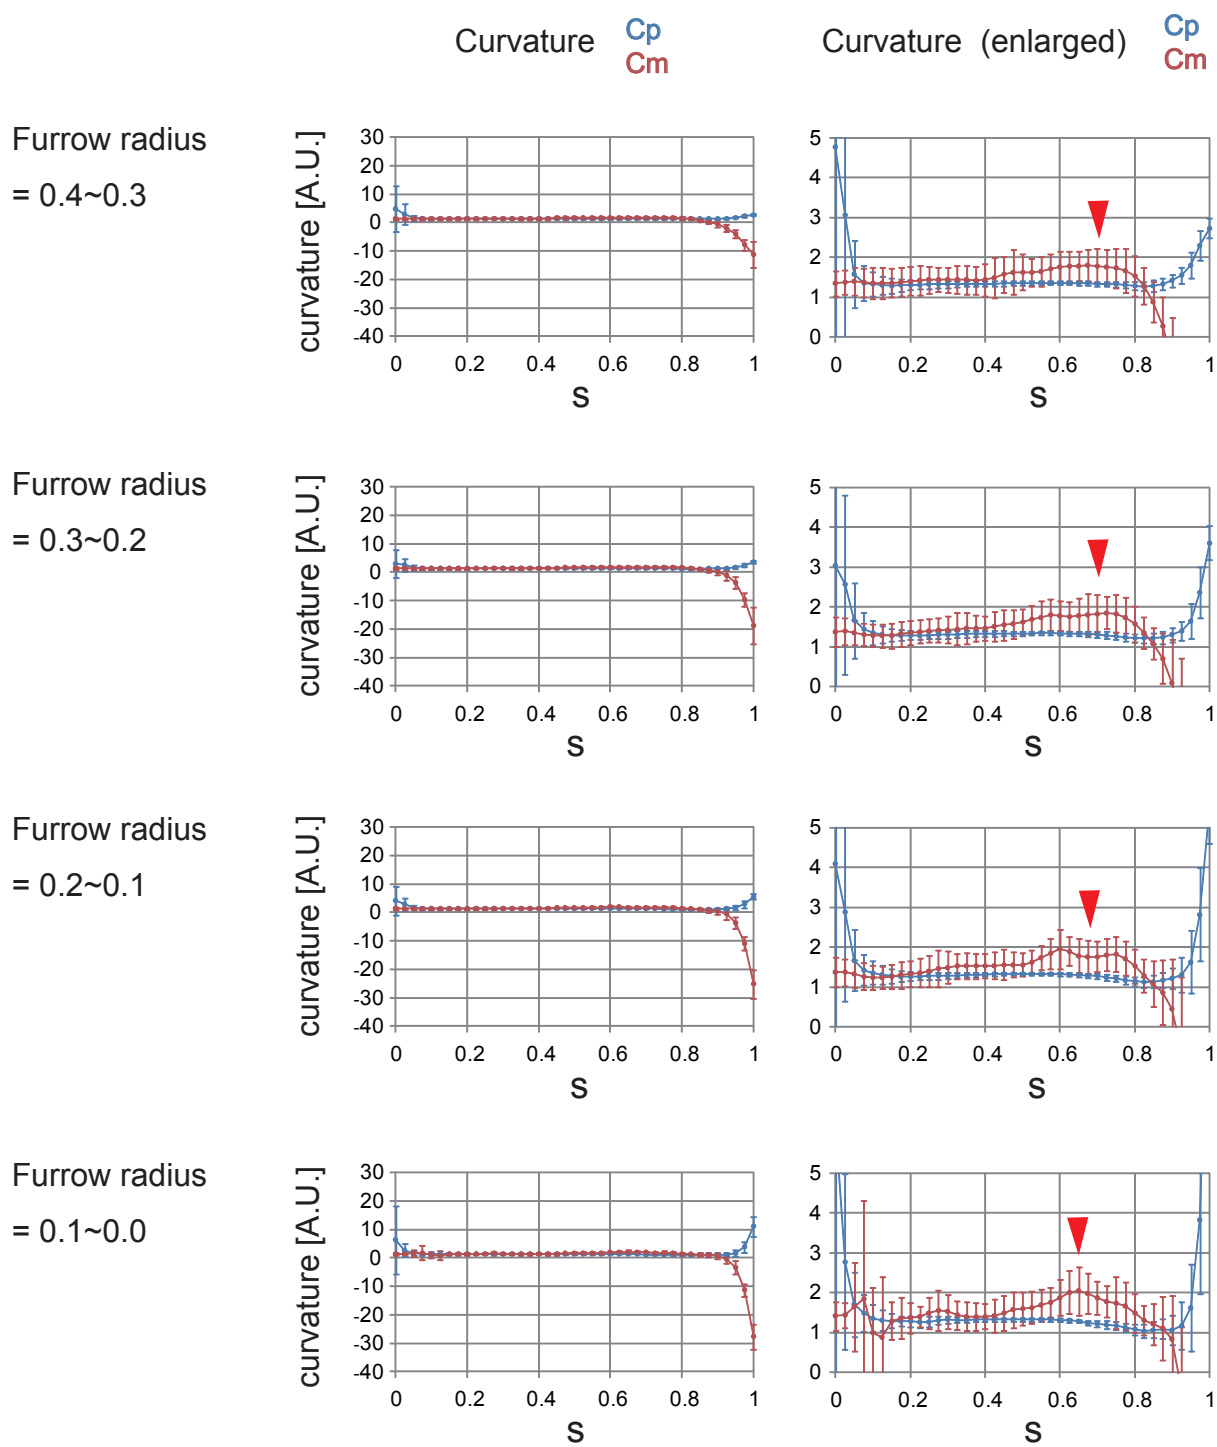

Figure S3 (continued)

C

*zen-4 ts*Curvature  $C_p$   
 $C_m$ Curvature (enlarged)  $C_p$   
 $C_m$ 

Furrow radius = 0.9~0.8

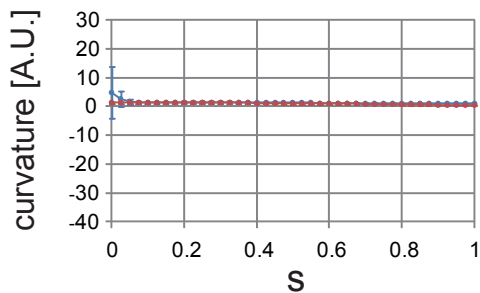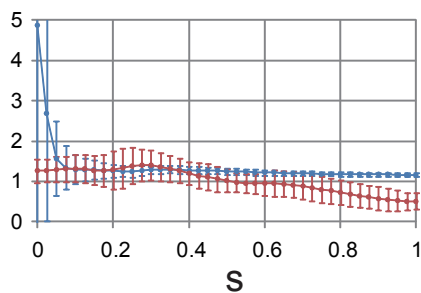

Furrow radius = 0.8~0.7

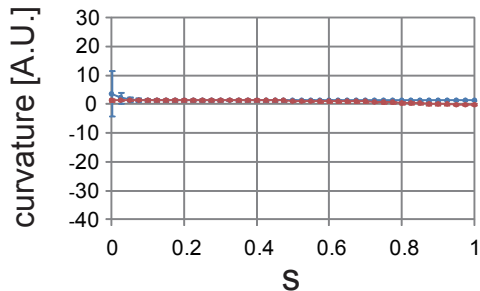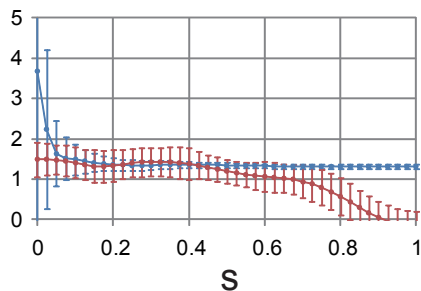

Furrow radius = 0.7~0.6

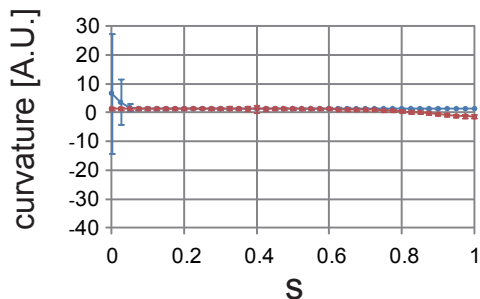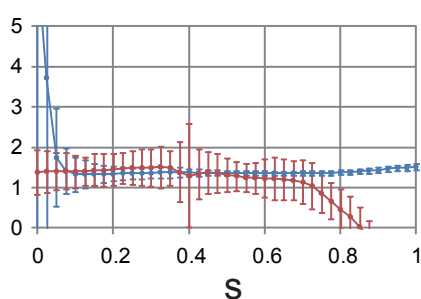

Furrow radius = 0.6~0.5

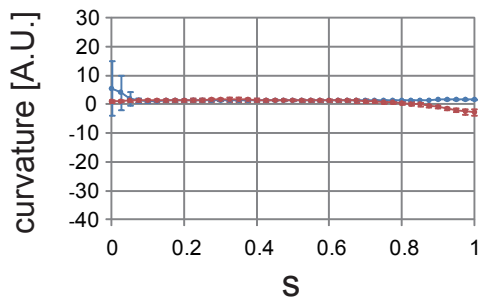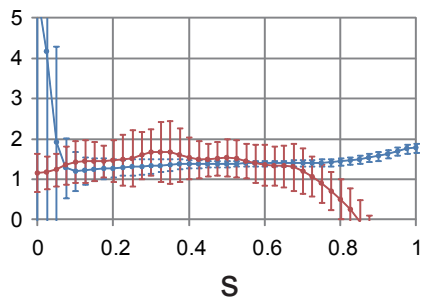

D

Curvature  $C_m$ *wild-type vs zen-4 ts*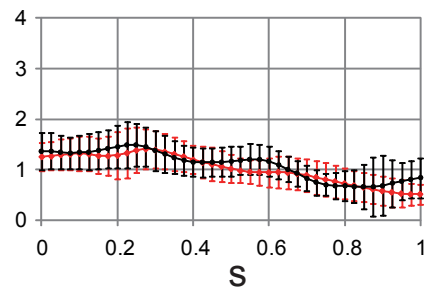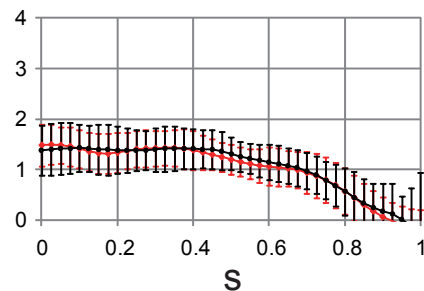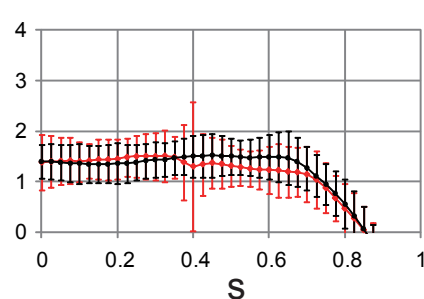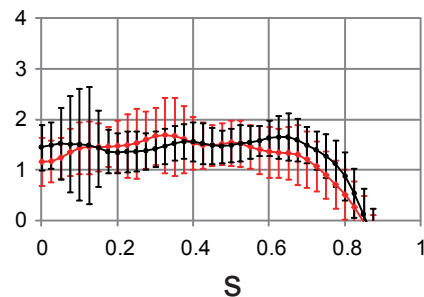

Figure S3 (continued)
