# Supplementary material for: A High-Resolution Shape Fitting and Simulation Demonstrated Equatorial Cell Surface Softening during Cytokinesis and Its Promotive Role in Cytokinesis
Source: PubMed Central journal article supplement (PMC3281004; doi:10.1371/journal.pone.0031607), 2012-02-16
Supplement: pone.0031607.s005.pdf [file pone.0031607.s005.pdf]

A

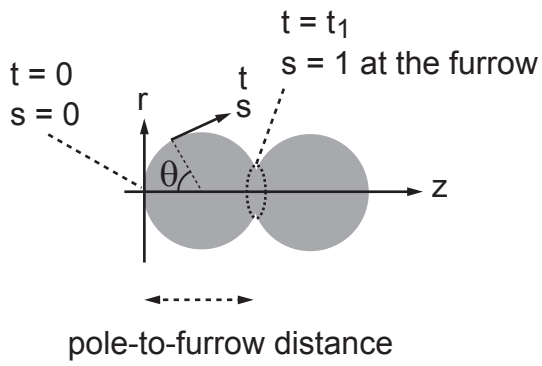

B

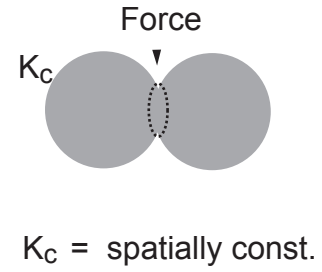

C

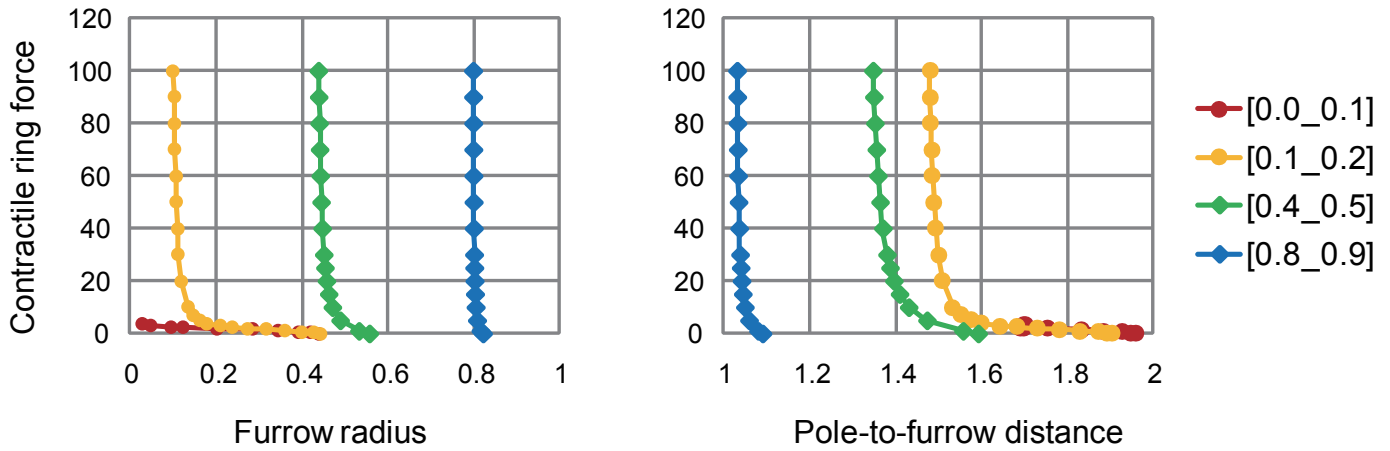

D

Furrow radius = 0.2~0.1

Shape

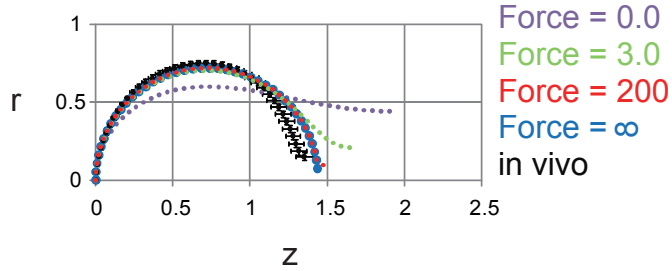Curvature  $C_m$ 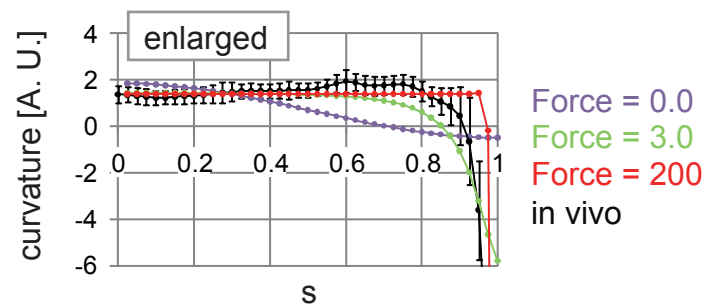

Figure S4
