# Supplementary material for: A High-Resolution Shape Fitting and Simulation Demonstrated Equatorial Cell Surface Softening during Cytokinesis and Its Promotive Role in Cytokinesis
Source: PubMed Central journal article supplement (PMC3281004; doi:10.1371/journal.pone.0031607), 2012-02-16
Supplement: pone.0031607.s009.pdf [file pone.0031607.s009.pdf]

Force = 20.0

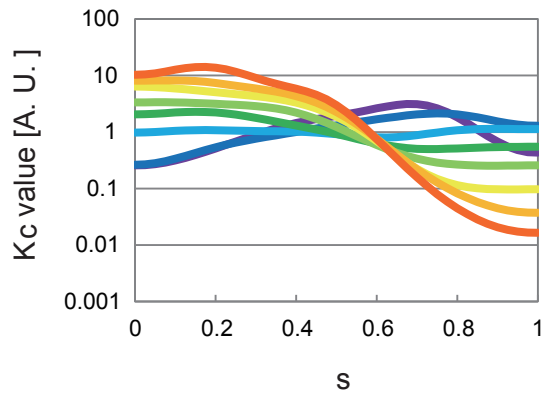

Force = 50.0

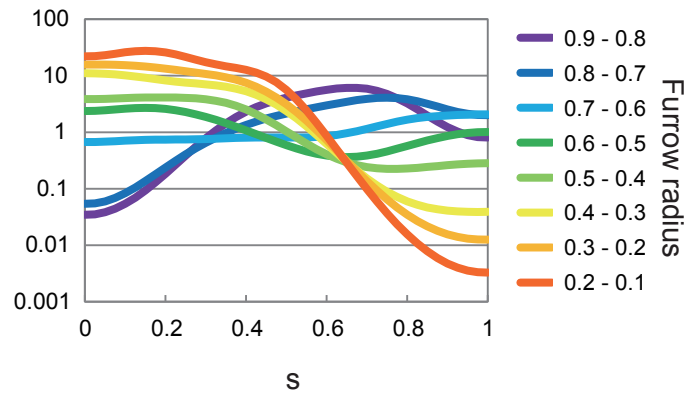

Figure S8
