# Supplementary material for: A High-Resolution Shape Fitting and Simulation Demonstrated Equatorial Cell Surface Softening during Cytokinesis and Its Promotive Role in Cytokinesis
Source: PubMed Central journal article supplement (PMC3281004; doi:10.1371/journal.pone.0031607), 2012-02-16
Supplement: pone.0031607.s010.pdf [file pone.0031607.s010.pdf]

A

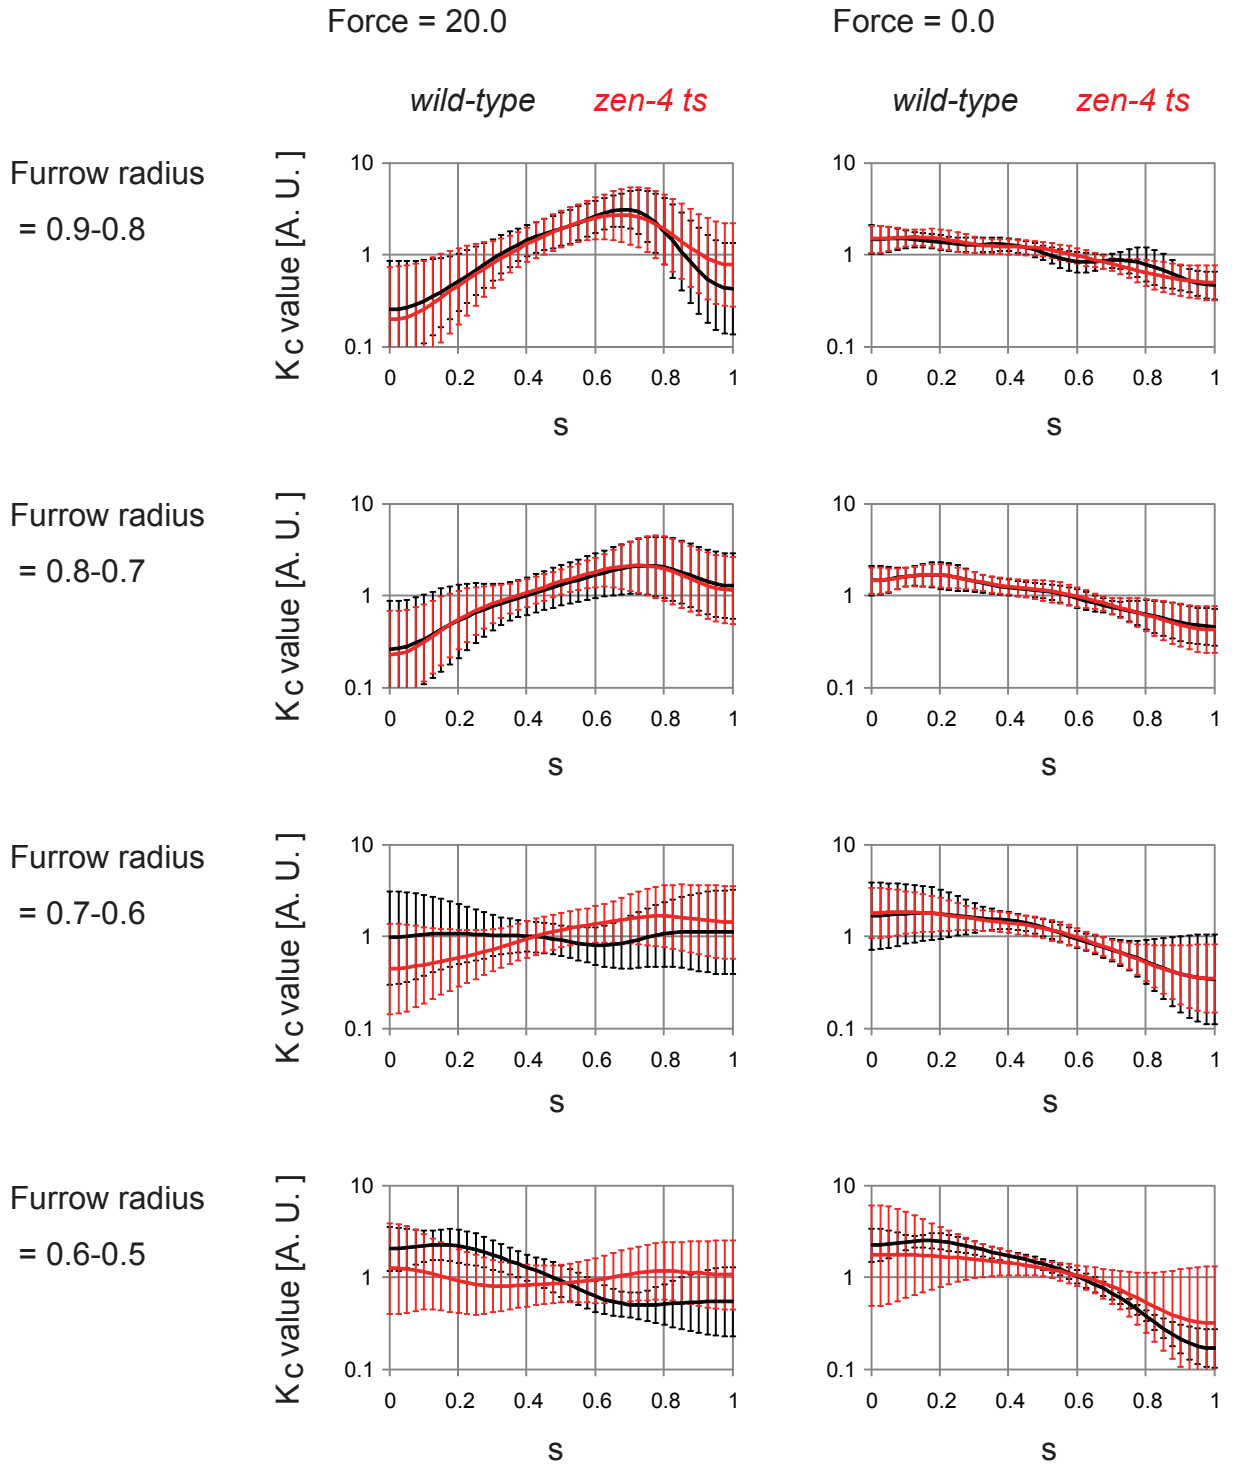

B

Force = 50.0

Furrow radius = 0.6-0.5

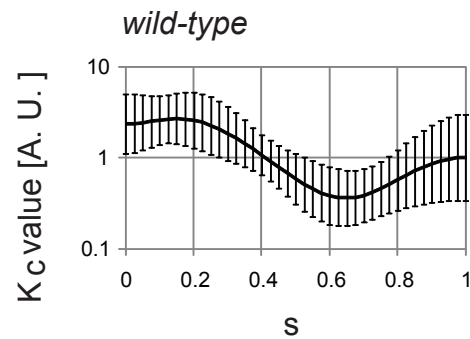

Figure S9
