# Supplementary material for: A High-Resolution Shape Fitting and Simulation Demonstrated Equatorial Cell Surface Softening during Cytokinesis and Its Promotive Role in Cytokinesis
Source: PubMed Central journal article supplement (PMC3281004; doi:10.1371/journal.pone.0031607), 2012-02-16
Supplement: pone.0031607.s015.pdf [file pone.0031607.s015.pdf]

Surface tension  $T_p$

wild-type *zen-4 ts*

Furrow radius  
= 0.9-0.8

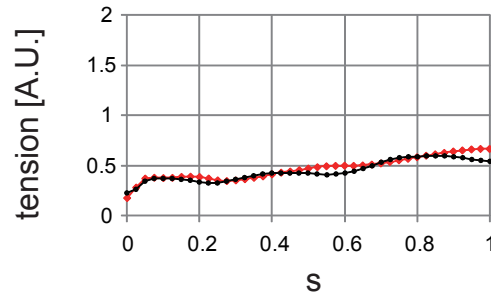

Furrow radius  
= 0.8-0.7

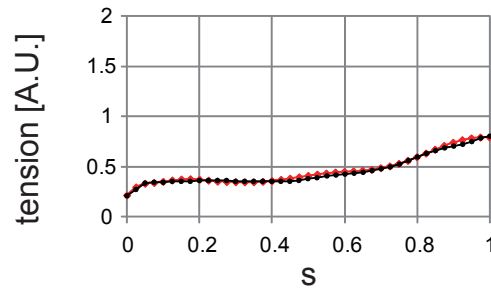

Furrow radius  
= 0.7-0.6

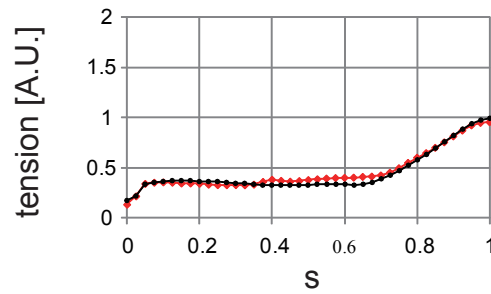

Furrow radius  
= 0.6-0.5

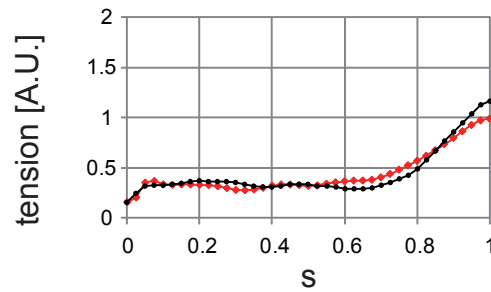

Figure S14
